# Supplementary material for: Simultaneous gene silencing of KRAS and anti-apoptotic genes as a multitarget therapy
Source: PubMed Central journal article supplement (PMC4826184; doi:10.18632/oncotarget.6766), 2015-12-26
Supplement: oncotarget-07-3984-s001.pdf [file oncotarget-07-3984-s001.pdf]

# Simultaneous gene silencing of *KRAS* and anti-apoptotic genes as a multitarget therapy

## Supplementary Materials

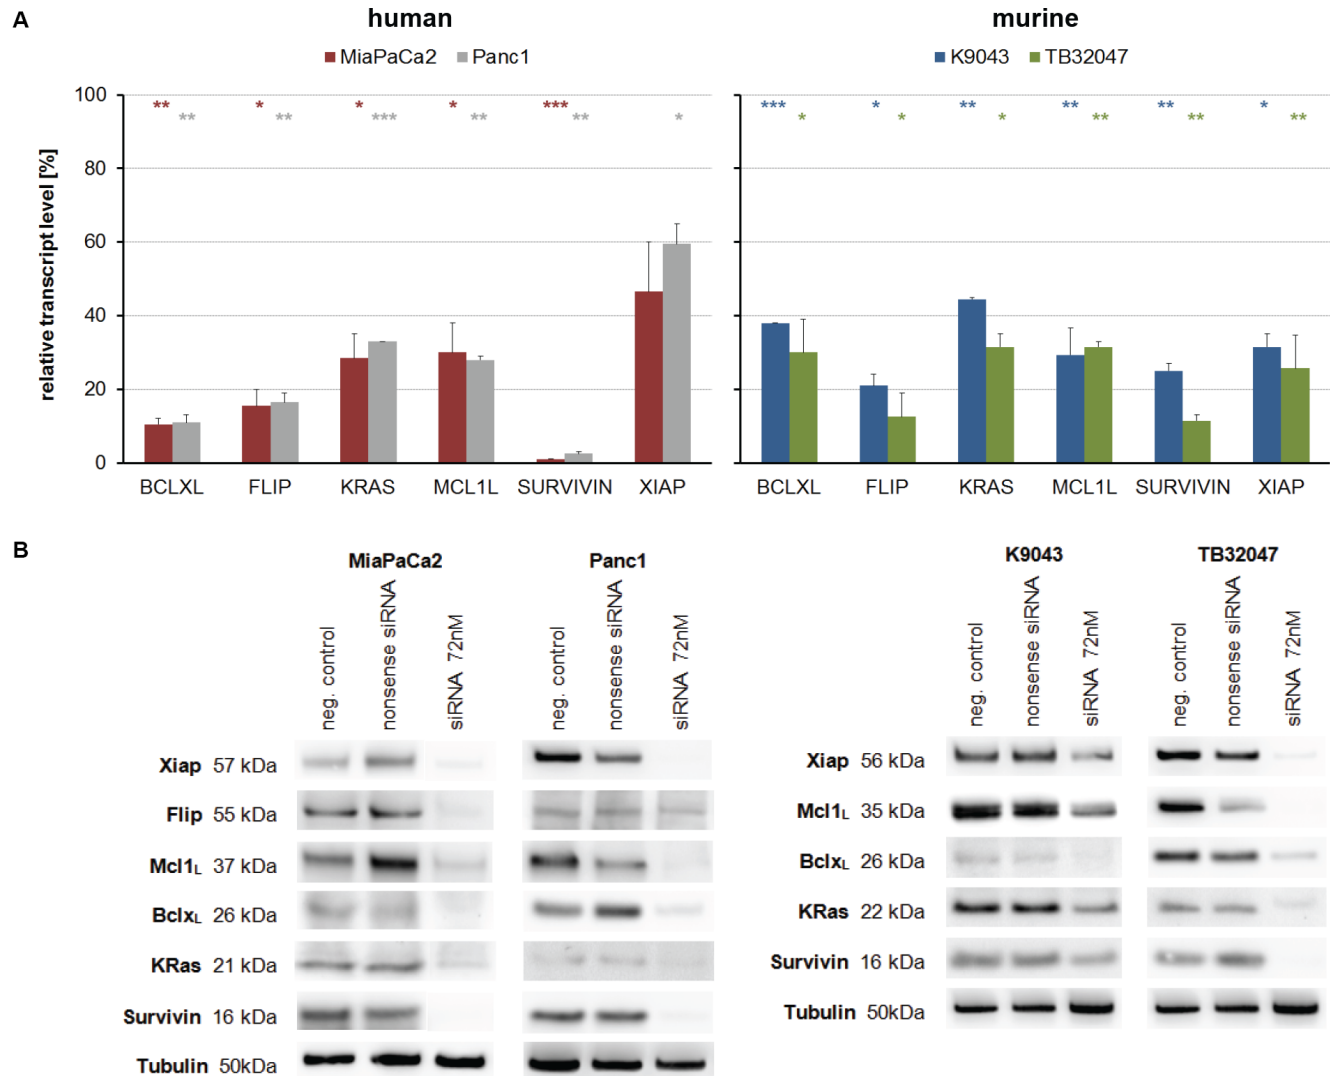

**Supplementary Figure S1: Target inhibition by high-concentration siRNA treatment.** Human and murine PDAC cell lines were transfected with 72 nM siRNAs for 72 h. (A) Transcriptional level knockdowns were confirmed by qRT-PCR. (B) The effect on protein quantity was confirmed by Western blotting.

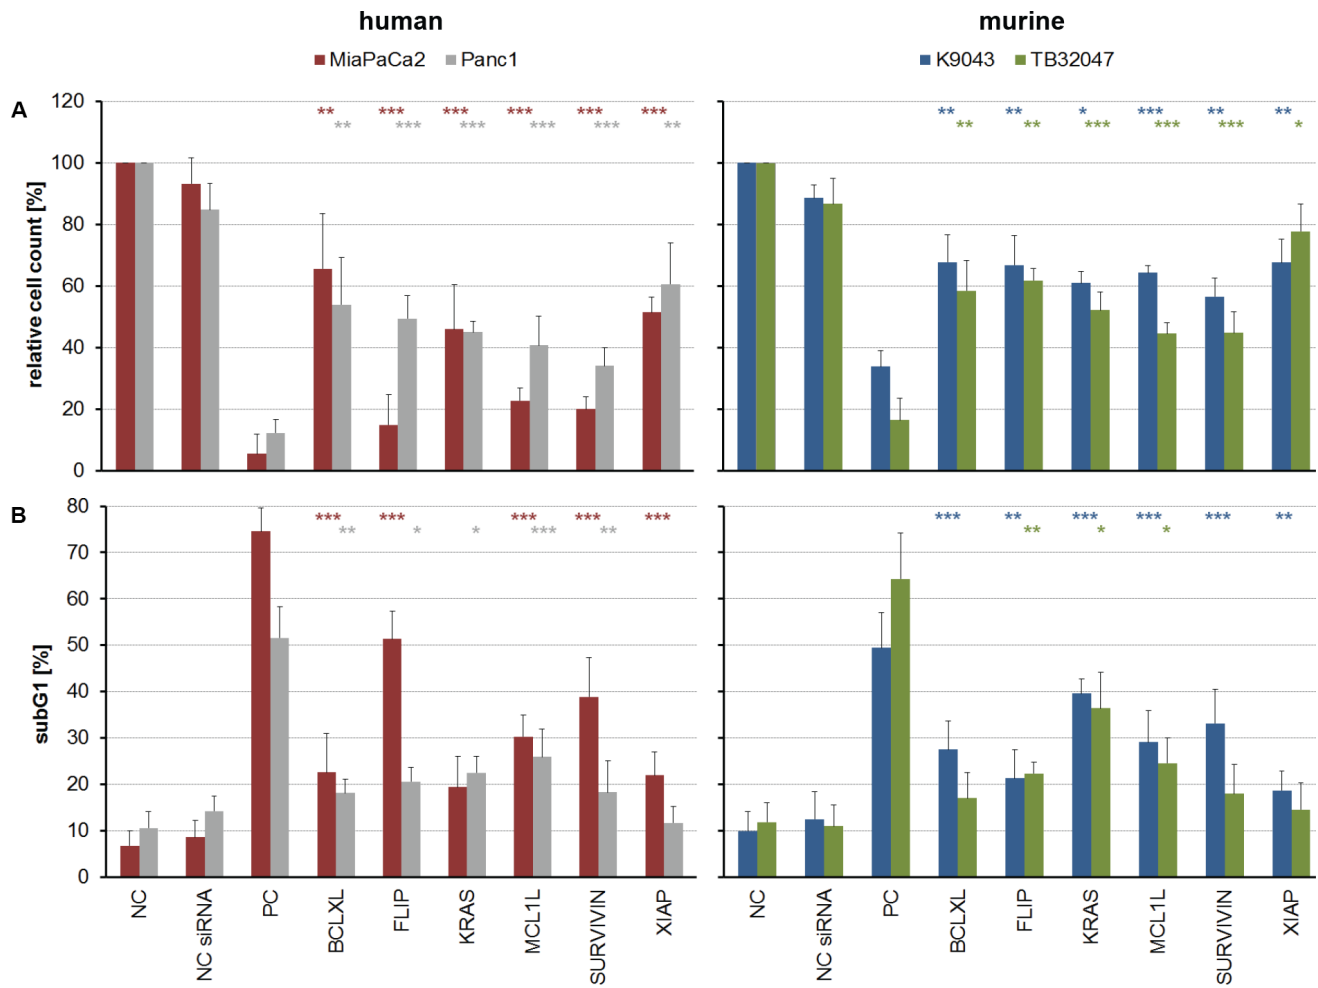

**Supplementary Figure S2: Cellular effects caused by high-concentration siRNA treatment.** (A) After gene silencing with 72 nM siRNA adherent cells were counted in relation to their negative control (NC;  $n \geq 4$ ). (B) For evaluation of apoptosis induction subG1 fractions were determined by cell cycle analysis ( $n \geq 4$ ;  $*p \leq 0,05$ ,  $**p \leq 0,01$ ,  $***p \leq 0,001$ ). An unpaired Student's *t*-test was used to compare the differences between the NC and the cells treated with target-directed siRNAs.

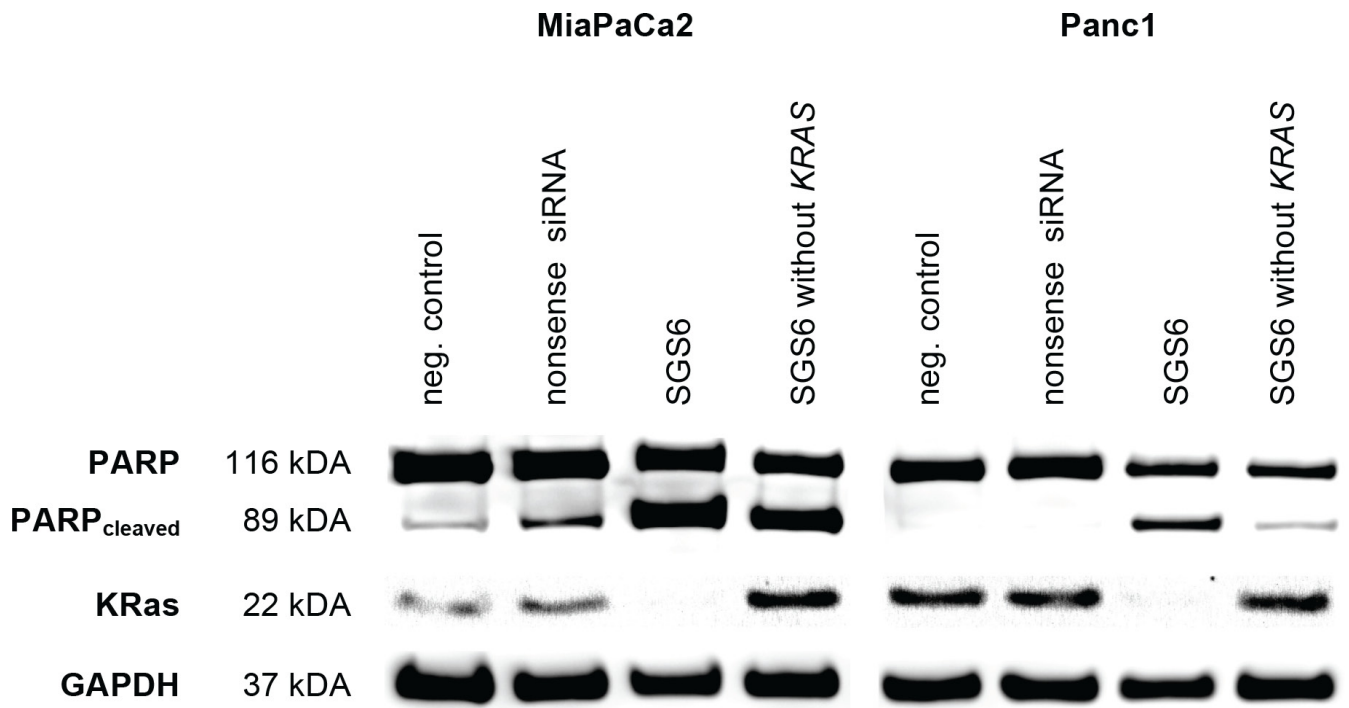

**Supplementary Figure S3: Cleaved PARP induction after siRNA treatment in human pancreatic cancer cells.** Cleaved PARP is induced after 72 h treatment of cells with siRNA combinations against either six (SGS6) or five (SGS6 without *KRAS*) target genes.

## 72 nM single target inhibition

## SGS6

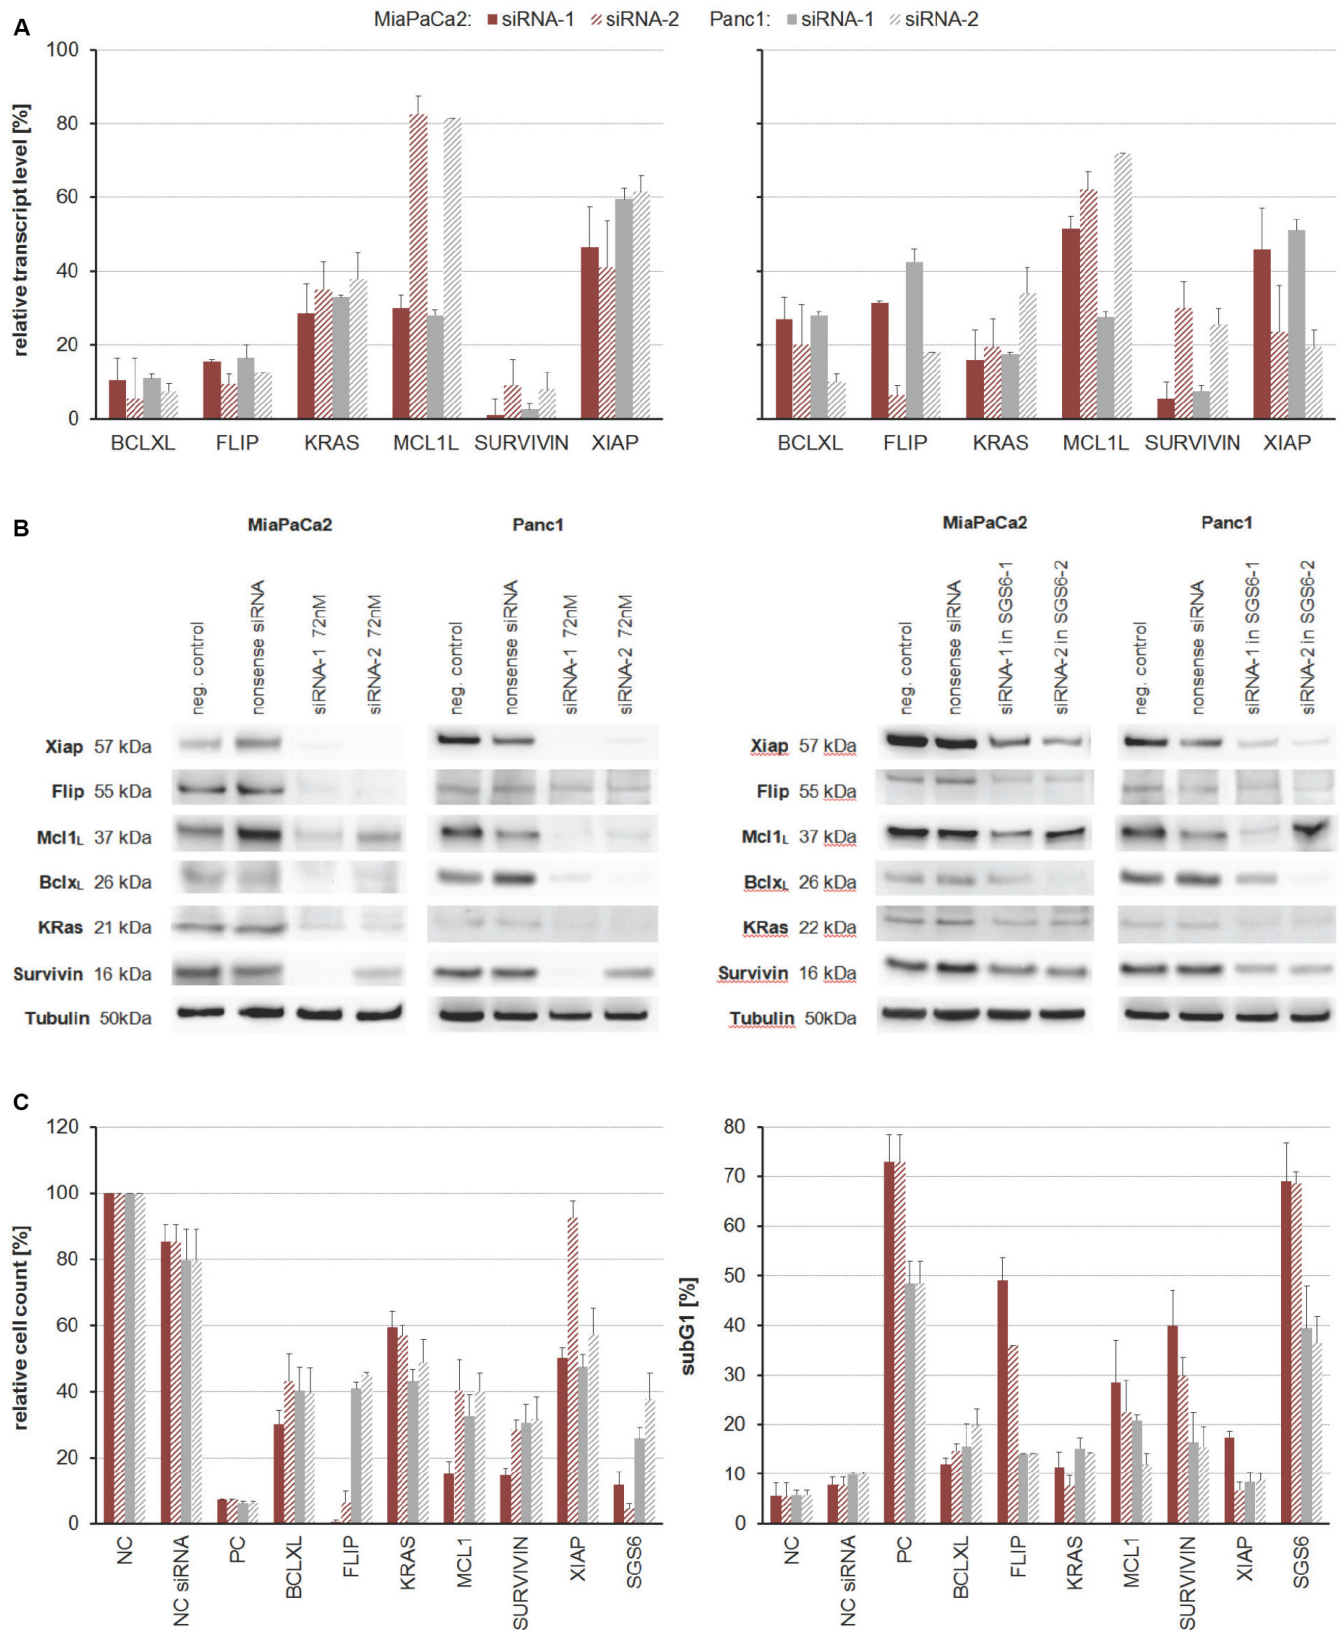

**Supplementary Figure S4: Validation of gene silencing effects with second human siRNAs.** Additional to the first used, human siRNAs second ones were established per gene. (A) Knockdowns were confirmed by qRT-PCR relative to their negative control (NC) and (B) by Western blots. The cellular effects were analyzed 72 h after transfection with 72 nM siRNA for single target inhibition or  $6 \times 12$  nM for SGS6 respectively. (C) Adherent cells were counted and (D) subG1 fractions were determined by cell cycle analysis.

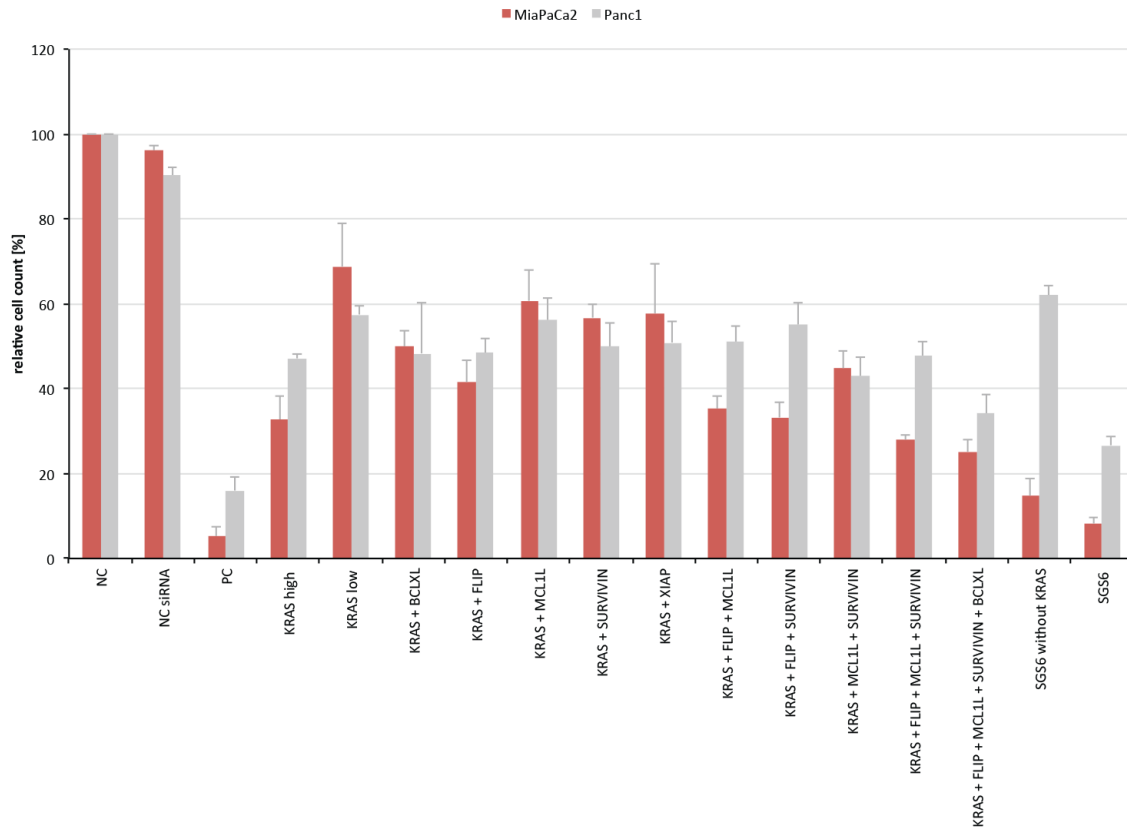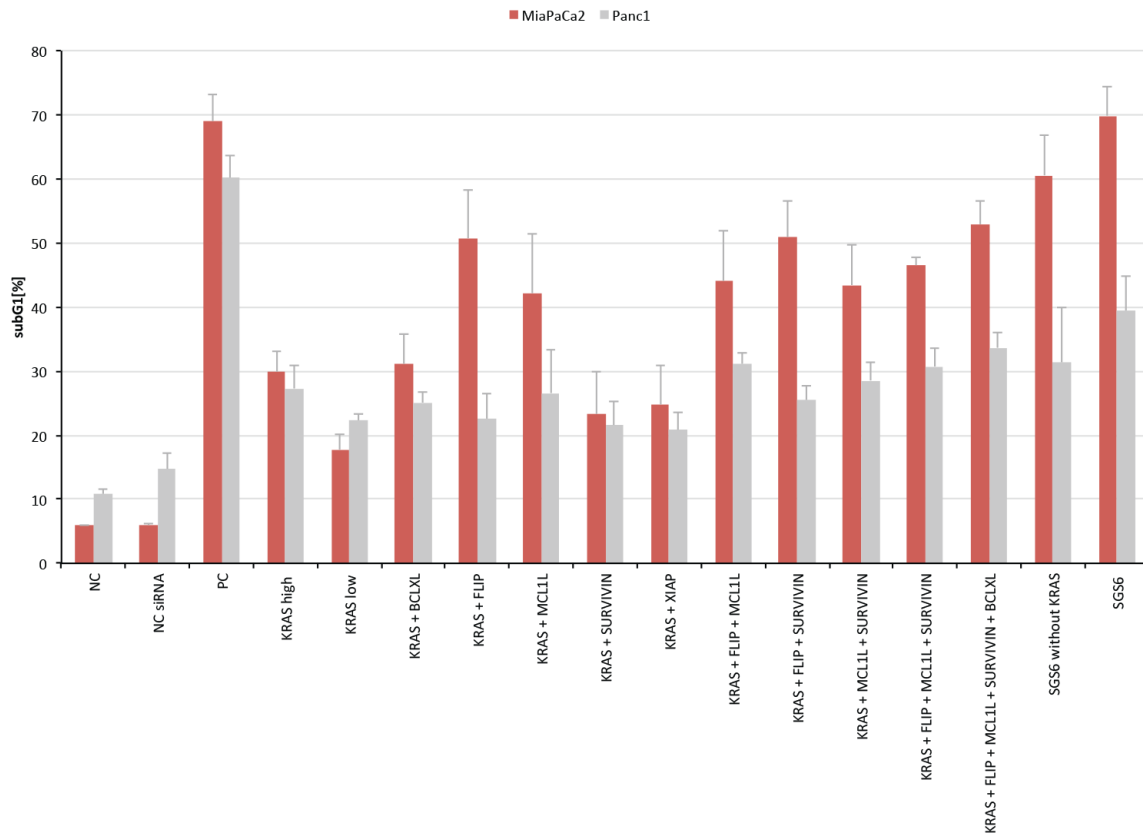

**Supplementary Figure S5: Cellular effects caused by different siRNA combinations.** (A) After gene silencing with 12 nM of each siRNA adherent cells were counted in relation to their negative control (NC;  $n \geq 4$ ). (B) For evaluation of apoptosis induction subG1 fractions were determined by cell cycle analysis ( $n \geq 4$ ).

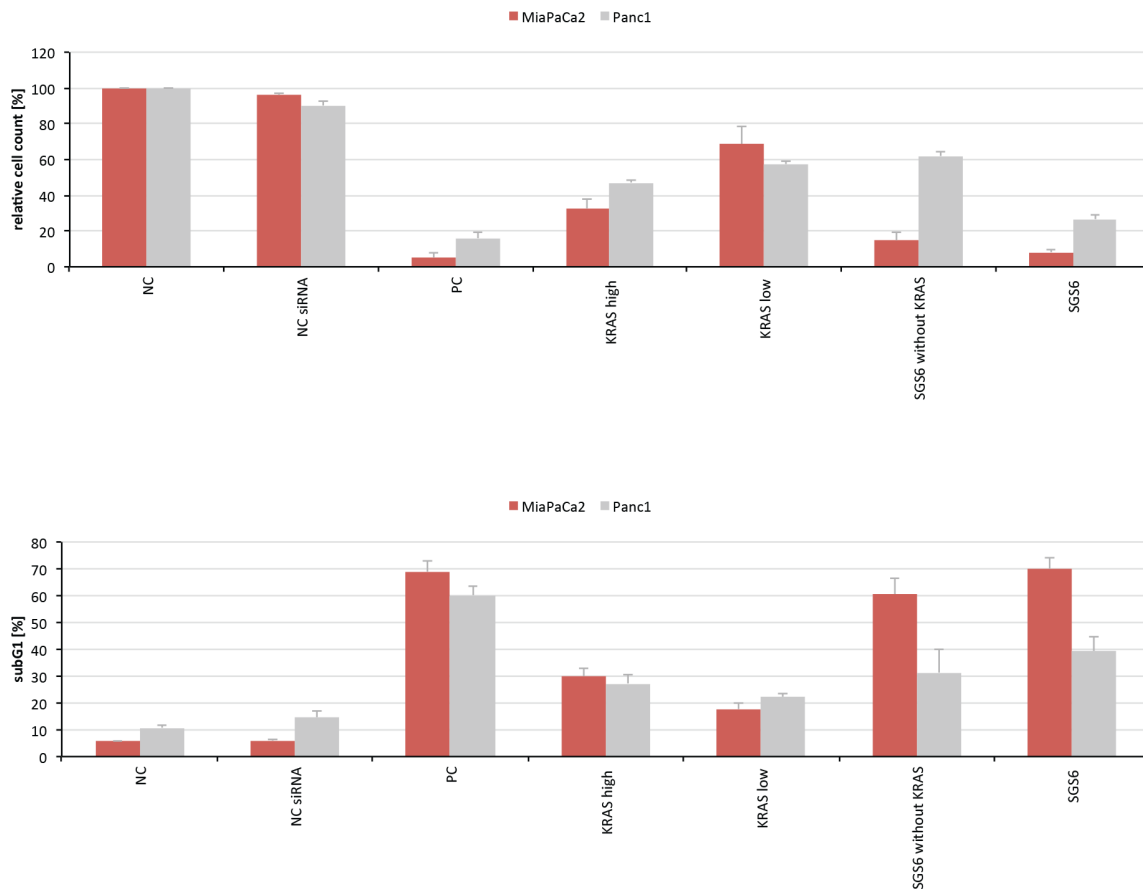

**Supplementary Figure S6: Cellular effects caused by different concentrations of *KRAS* siRNA alone or in combination with five other siRNAs.** (A) After gene silencing with 12 nM of each siRNA adherent cells were counted in relation to their negative control (NC;  $n \geq 4$ ). (B) For evaluation of apoptosis induction subG1 fractions were determined by cell cycle analysis ( $n \geq 4$ ).

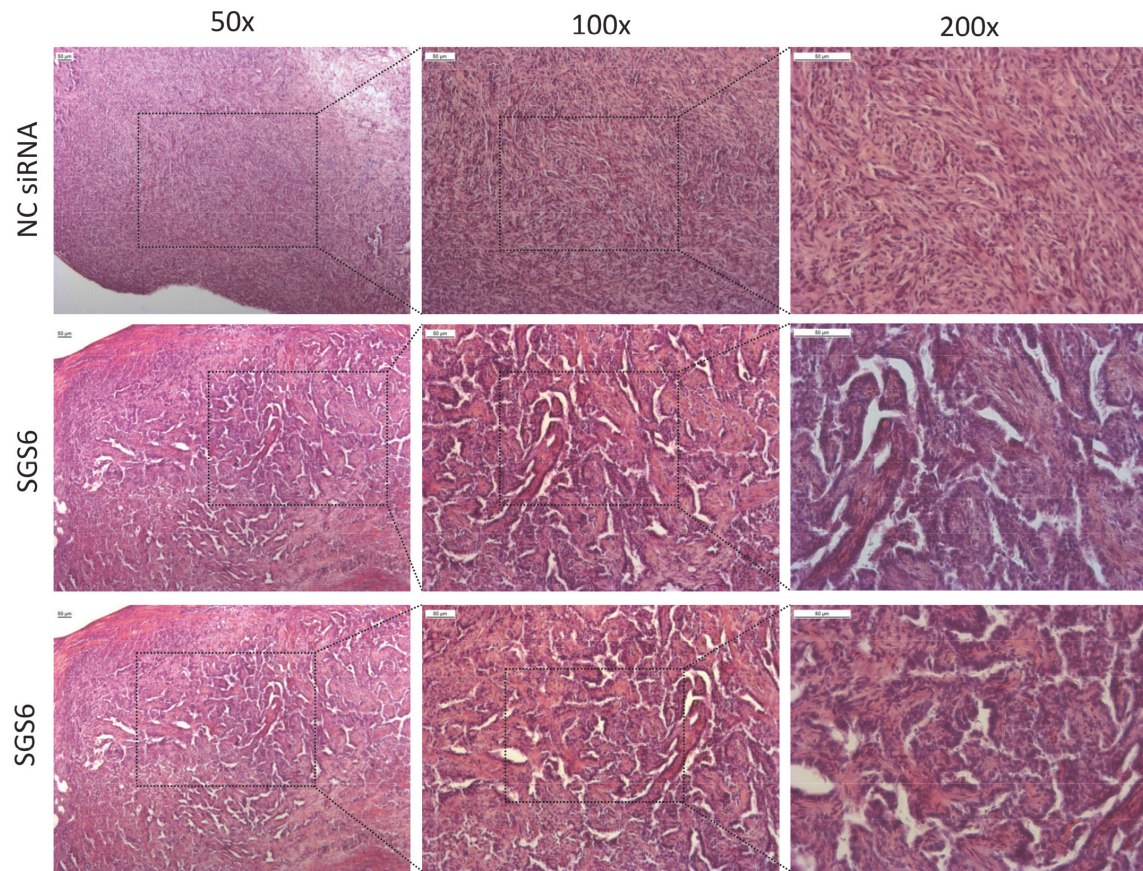

**Supplementary Figure S7: Histopathological structure of subcutaneous tumors after treatment with SGS6.** Upper panel: Tumor treated with allstars negative control. Middle and lower panel: tumor treated with SGS6, displaying a more differentiated glandular structure compared to the upper panel.

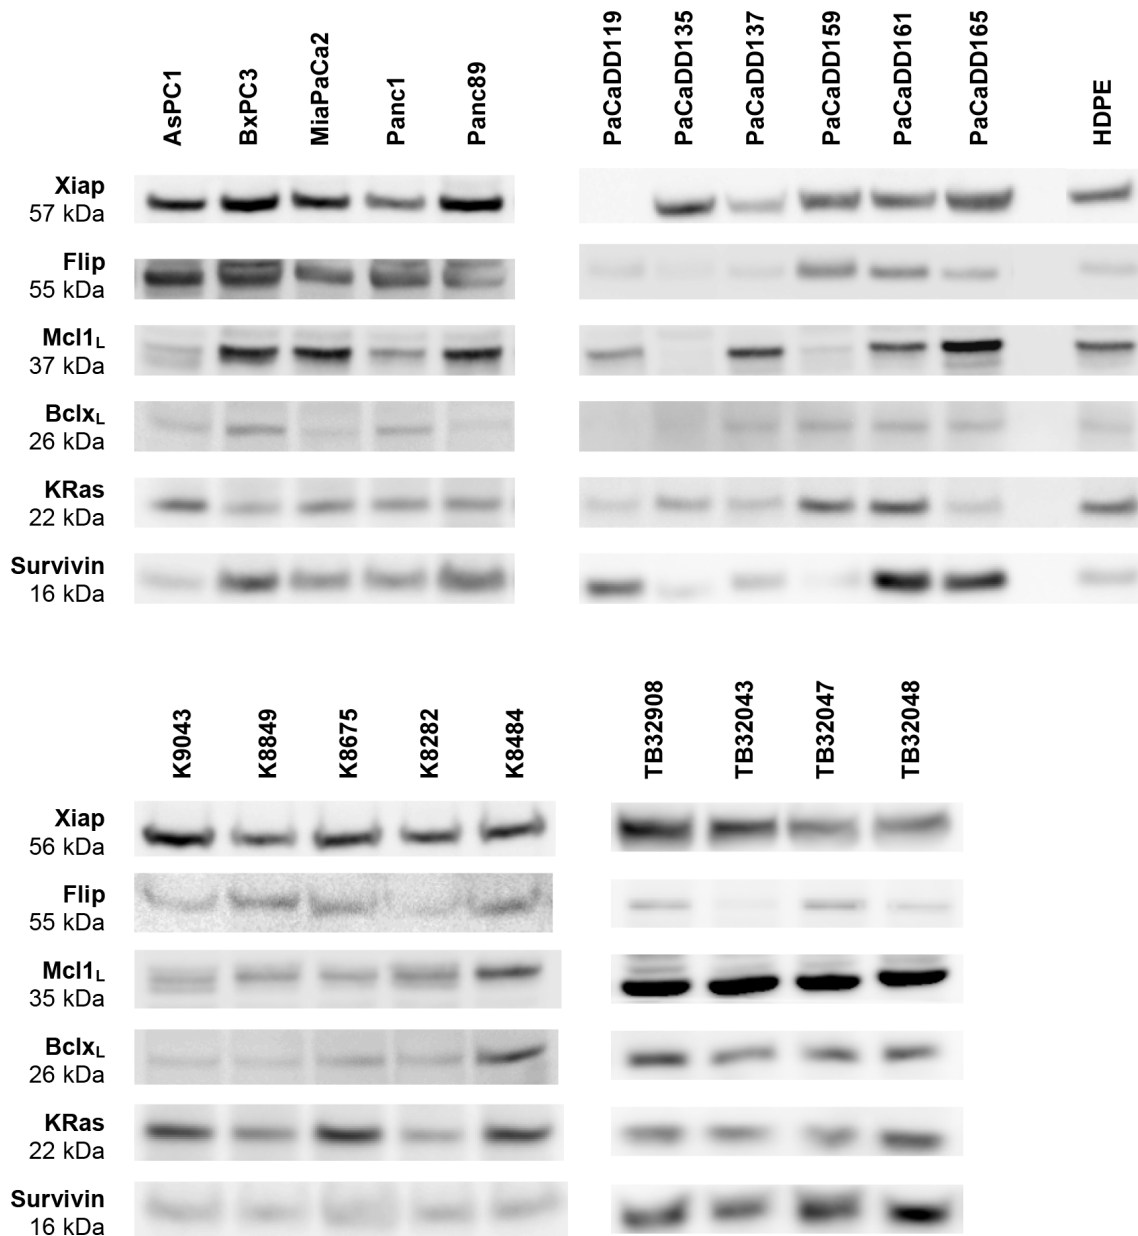

**Supplementary Figure S8: Exemplary Western blots for the generation of Figure 1.** Lysates of standard and primary human pancreatic cancer cell lines and from the *KPC* mouse model were subjected to Western blot analysis. Based on these analyses the expression levels of Bclx<sub>L</sub>, Flip, KRas, Mcl1<sub>L</sub>, Survivin and Xiap compared to the human non-tumorous, epithelial pancreatic duct HDPE-E6E7 cell line were summarized as heatmap in Figure 1.



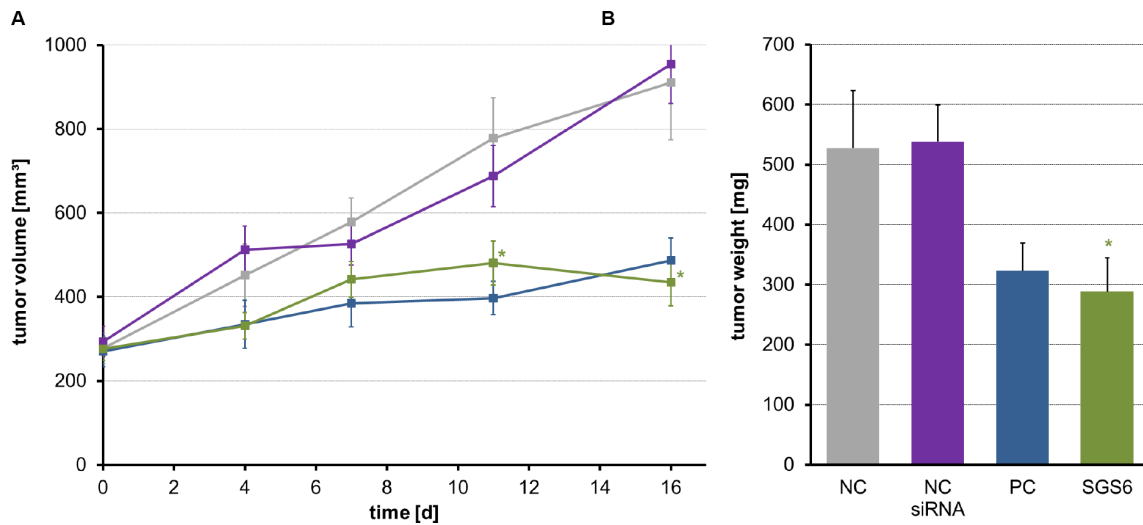

**Supplementary Figure S9: Treatment of MiaPaCa2-xenografts with the SGS6 therapy.** Subcutaneous, bilateral MiaPaCa2 tumors of NMRI<sup>nu/nu</sup> mice were treated every second day with 10 µg of *in vivo* jet-PEI complexed SGS6 siRNA for 16 d (4–6 tumors per group). (A) Tumor volumes were measured during therapy and (B) their weight was analyzed after preparation at day 18. Means ± standard errors are shown and an unpaired Student's *t*-test was used to compare the differences between the negative control (NC) and the SGS6 treated tumors (\**p* ≤ 0,05).

**Supplementary Table S1: KRAS mutation states, origin and grading of used cell lines**

|        |           | Cell lines  | Reference      | KRAS mutation  | Origin                     | Grading       |
|--------|-----------|-------------|----------------|----------------|----------------------------|---------------|
| Human  | Common    | HDPE-E6E7   | M. Tsao        | WT             | pancreatic duct epithelium | –             |
|        |           | AsPC1       | ATCC CRL-1682  | G12D           | ascites                    | G2            |
|        |           | BxPC3       | ATCC CRL-1687  | WT             | primary tumor              | G2            |
|        |           | Hs766T      | ATCC HTB-134   | Q61H           | lymph node metastasis      | G1            |
|        |           | MiaPaCa2    | ATCC CRL-1420  | G12C           | primary tumor              | G3            |
|        |           | Panc1       | ATCC CRL-1469  | G12D           | primary tumor              | G3            |
|        |           | Panc89/T3M4 | H. Kalthoff    | Q61H           | lymph node metastasis      | G2            |
|        |           | Primary     | PaCaDD43       | F. Rückert [1] | G12D                       | primary tumor |
|        | PaCaDD60  |             |                | G12D           | pleural effusion           | G2            |
|        | PaCaDD119 |             |                | G12A           | primary tumor              | G3            |
|        | PaCaDD135 |             |                | G12V           | lymph node metastasis      | G2/3          |
|        | PaCaDD137 |             |                | WT             | primary tumor              | G2            |
|        | PaCaDD159 |             |                | G12V           | primary tumor              | G2            |
|        | PaCaDD161 |             |                | G12V           | liver metastasis           | G3            |
|        | PaCaDD165 |             | WT             | ascites        | G3                         |               |
| Murine | KPC       | K8282       | D. Tuveson [2] | G12D           | KPC mouse model            |               |
|        |           | K8484       |                | G12D           |                            |               |
|        |           | K8675       |                | G12D           |                            |               |
|        |           | K8849       |                | G12D           |                            |               |
|        |           | K9043       |                | G12D           |                            |               |
|        | KPC B6    | TB32043     | D. Tuveson [2] | G12D           | KPC mouse model            |               |
|        |           | TB32047     |                | G12D           |                            |               |
|        |           | TB32048     |                | G12D           |                            |               |
|        |           | TB32908     |                | G12D           |                            |               |
|        |           |             |                | G12D           |                            |               |

**Supplementary Table S2: Media used for the cell cultures**

| Cell lines         | Media                                                                                           |
|--------------------|-------------------------------------------------------------------------------------------------|
| AsPC1              | RPMI (incl. 2 mM L-glutamine) + 10% FBS + 4,5 g/l glucose + 1 mM natrium pyruvate + 10 mM HEPES |
| BxPC3              | RPMI (incl. 2 mM L-glutamine) + 10% FBS + 4,5 g/l glucose + 1 mM natrium pyruvate + 10 mM HEPES |
| HDPE-E6E7          | K-SFM                                                                                           |
| Hs766T             | DMEM + 10% FBS                                                                                  |
| MiaPaCa2           | DMEM + 10% FBS + 2,5 % horse serum                                                              |
| Panc1              | RPMI (incl. 2 mM L-glutamine) + 10% FBS                                                         |
| Panc89/T3M4        | RPMI (incl. 2 mM L-glutamine) + 10% FBS                                                         |
| murine cell lines  | DMEM + 10% FBS                                                                                  |
| primary cell lines | DMEM + 20% FBS + 50 % K-SFM                                                                     |

**Supplementary Table S3: Designations and target sequences of the siRNAs**

| Target protein    | Target gene   | siRNA name                                 | siRNA target sequence                                                  | Reference                                    |
|-------------------|---------------|--------------------------------------------|------------------------------------------------------------------------|----------------------------------------------|
| Bclx <sub>L</sub> | <i>BCL2L1</i> | Hs_BCL2L1.1<br>Hs/Mm_BCL2L1.2<br>Mm_BCL2L1 | GCAGCUUGGAUGGCCACUU<br>AGACAAGGAGAUGCAGGUAUU<br>GCAAGUUGGAUGGCCACCU    | homologous to Hs BCL2L1.1                    |
| Flip              | <i>CFLAR</i>  | Hs_CFLAR.1<br>Hs_CFLAR.2<br>Mm_CFLAR       | CAGGAACCCUCACCUUGUU<br>AGGCAAGAUAAAGCAAGGAGAA<br>GCCAAGGAGCAAGAUCAAAUA | [3]<br>[4]                                   |
| KRas              | <i>KRAS</i>   | Hs_KRAS.1<br>Hs/Mm_KRAS.2                  | AAGGAGAAUUUAAUAAAGUA<br>GGCUAUUUACAUGCUACUA                            | Qiagen, Hilden, Germany<br>[5]               |
| Mcl1 <sub>L</sub> | <i>MCL1</i>   | Hs_MCL1.1<br>Hs_MCL1.2<br>Mm_Mcl1          | AAGUAUCACAGACGUUCUC<br>GAAAGCUGCAUCGAACCAU<br>GAAAGCUUCAUCGAACCAUUU    | [6]<br>[7]<br>[8]                            |
| Survivin          | <i>BIRC5</i>  | Hs_BIRC5.1<br>Hs_BIRC5.2<br>Mm_BIRC5       | GAAUUUGAGGAAACUGCGA<br>CACCACUUCAGGGUUUAU<br>GAGUUUGAAGAGACUGCAA       | [9, 10]<br>[11]<br>homologous to Hs Birc5.1  |
| Xiap              | <i>BIRC4</i>  | Hs_BIRC4.1<br>Hs_BIRC4.2<br>Mm_BIRC4       | GUGGUAGUCCUGUUUCAGC<br>CGAGCAGGGUUUCUUUAUA<br>GUAGUAGUCCUGUUUCAGC      | [10, 12]<br>[13]<br>homologous to Hs Birc4.2 |
| Eg5               | <i>KIF11</i>  | Hs/Mm_KIF11                                | AACUGAAGACCUGAAGACAAU                                                  | [10]                                         |

As negative control we used Allstars siRNA (Qiagen, Hilden, Germany), as positive control siRNA targeting *KIF11/Eg5*, an essential cytoskeletal component.

**Supplementary Table S4: Sequences of primers for qRT-PCR**

| Target gene   | Human                                |                                               | Murine                             |                                                     |
|---------------|--------------------------------------|-----------------------------------------------|------------------------------------|-----------------------------------------------------|
|               | Primer name                          | Sequence (5'→3')                              | Primer name                        | Sequence (5'→3')                                    |
| <i>ACTB</i>   | Hs_ACTB_185_f2<br>Hs_ACTB_185_r2     | AAATCTGGCACCACACCTTC<br>AGAGGGCGTACAGGGATAGCA | Mm_ActB_154_f3<br>Mm_ActB_154_r3   | GGCTGTATTCCCCTCCATCG<br>CCAGTTGGTAACAATGCCA<br>TGT  |
| <i>BCL2L1</i> | Hs_BCL2L1_166_f1<br>Hs_BCL2L1_166_r1 | ATGAACTCTTCCGGGATGG<br>TGGATCCAAGGCTCTAGGTG   | Mm_BCL2L1_187_f<br>Mm_BCL2L1_187_r | GTTGGATGGCCACCTATCTG<br>AAGAGTGAGCCCAGCAGAAC        |
| <i>BIRC4</i>  | Hs_BIRC4_135_f1<br>Hs_BIRC4_135_r1   | CACTTGAGGTTCTGGTTGCAG<br>TGCAAAGCTTCTCCTCTTGC | Mm_BIRC4_157_f<br>Mm_BIRC4_157_r   | TTGGAACATGGACATCCTCA<br>TACCACTTCGCATGCTGTTC        |
| <i>BIRC5</i>  | Hs_BIRC5_141_f1<br>Hs_BIRC5_141_r1   | GTTGCGCTTTCCTTTCTGTC<br>TCTCCGCAGTTTCTCAAAT   | Mm_BIRC5_106_f<br>Mm_BIRC5_106_r   | ATCGCCACCTTCAAGAACTG<br>AATCAGGCTCGTTTCTCGGTA       |
| <i>CFLAR</i>  | Hs_CFLAR_170_f2<br>Hs_CFLAR_170_r2   | AGAGGTAAGCTGTCTGTCGG<br>TCCTCACCAATCTTGCCAT   | Mm_CFLAR_127_f<br>Mm_CFLAR_127_r   | AACCCTCACCTGGTTTCTGA<br>CCTTGGCTATCTTGCCTCTG        |
| <i>GAPDH</i>  |                                      |                                               | Mm_GAPDH_171_f<br>Mm_GAPDH_171_r   | AGCTTGTCATCAACGGGAAG<br>CGGAGATGATGACCCTTTTG        |
| <i>KRAS</i>   | Hs_KRAS_193_f1<br>Hs_KRAS_193_r1     | GTACATGAGGACTGGGGAGG<br>TGCTAAGTCCTGAGCCTGTT  | Mm_KRAS_184_f<br>Mm_KRAS_184_r     | AGAGCGCCTTGACGATACAG<br>CCCTCCCCAGTTCTCATGTA        |
| <i>MCL1</i>   | Hs_MCL1L_175_f2<br>Hs_MCL1L_175_r2   | AAGGCGCTGGAGACCTTAC<br>TCACAATCCTGCCCCAGTTT   | Mm_MCL1_147_f2<br>Mm_MCL1_147_r2   | CAAAGATGGCGTAACAAAC<br>TGG<br>CGTTTCGTCCTTACAAGAACA |

## Supplementary Table S5: Primary antibodies used for Western blots (WB)

| Target protein    | Manufacturer, Cat. number (Clone)        | Source | Species | Dilution for WB |
|-------------------|------------------------------------------|--------|---------|-----------------|
| Bclx <sub>L</sub> | QED Bioscience, 11017                    | mouse  | Hs      | 1:100           |
|                   | Santa Cruz, sc-634                       | rabbit | Hs, Mm  | 1:200           |
|                   | CellSignaling, #2764                     | rabbit | Hs, Mm  | 1:1000          |
| Xiap              | Becton Dickinson, 610716                 | mouse  | Hs, Mm  | 1:500           |
| Survivin          | CellSignaling, #2808                     | rabbit | Hs, Mm  | 1:1000          |
| Flip              | Alexis Biochemicals, ALX-804-127 (Dave2) | rat    | Hs      | 1:1000          |
|                   | Adipogene, AG-20B-0056 (NF6)             | mouse  | Hs      | 1:1000          |
| GAPDH             | CellSignaling, #2118                     | rabbit | Hs, Mm  | 1:1000          |
| KRas              | Santa Cruz, sc-30                        | mouse  | Hs, Mm  | 1:100           |
| Mcl1 <sub>L</sub> | Santa Cruz, sc-819                       | rabbit | Hs      | 1:100           |
|                   | CellSignaling, #5453                     | rabbit | Mm      | 1:1000          |
| PARP              | CellSignaling, #9542                     | rabbit | Hs, Mm  | 1:1000          |
| Tubulin           | Sigma-Aldrich, T9026 (DM1A)              | mouse  | Hs, Mm  | 1:5000          |

## REFERENCES

- Rückert F, Aust D, Böhme I, Werner K, Brandt A, Diamandis EP, Krautz C, Hering S, Saeger HD, Grützmann R, Pilarsky C. Five Primary Human Pancreatic Adenocarcinoma Cell Lines Established by the Outgrowth Method. *J Surg Res.* 2011; 172:29–39.
- Olive KP, Jacobetz MA, Davidson CJ, Gopinathan A, McIntyre D, Honess D, Madhu B, Goldgraben MA, Caldwell ME, Allard D, Frese KK, Denicola G, Feig C, et al. Inhibition of Hedgehog signaling enhances delivery of chemotherapy in a mouse model of pancreatic cancer. *Science.* 2009; 324:1457–1461.
- Haag C, Stadel D, Zhou S, Bachem MG, Moller P, Debatin KM, Fulda S. Identification of c-FLIP(L) and c-FLIP(S) as critical regulators of death receptor-induced apoptosis in pancreatic cancer cells. *Gut.* 2011; 60:225–237.
- Cleary MA, Kilian K, Wang Y, Bradshaw J, Cavet G, Ge W, Kulkarni A, Paddison PJ, Chang K, Sheth N, Leproust E, Coffey EM, Burchard J, et al. Production of complex nucleic acid libraries using highly parallel in situ oligonucleotide synthesis. *Nat Methods.* 2004; 1:241–248.
- Paddison PJ, Silva JM, Conklin DS, Schlabach M, Li M, Aruleba S, Balija V, O'Shaughnessy A, Gnoj L, Scobie K, Chang K, Westbrook T, Cleary M, et al. A resource for large-scale RNA-interference-based screens in mammals. *Nature.* 2004; 428:427–431.
- Schulze-Bergkamen H, Fleischer B, Schuchmann M, Weber A, Weinmann A, Krammer PH, Galle PR. Suppression of Mcl-1 via RNA interference sensitizes human hepatocellular carcinoma cells towards apoptosis induction. *BMC Cancer.* 2006; 6: 232.
- Machida YJ, Chen Y, Machida Y, Malhotra A, Sarkar S, Dutta A. Targeted comparative RNA interference analysis reveals differential requirement of genes essential for cell proliferation. *Mol Biol Cell.* 2006; 17:4837–4845.
- Oishi K, Kamakura S, Isazawa Y, Yoshimatsu T, Kuida K, Nakafuku M, Masuyama N, Gotoh Y. Notch promotes survival of neural precursor cells via mechanisms distinct from those regulating neurogenesis. *Dev Biol.* 2004; 276:172–184.
- Asanuma K, Tsuji N, Endoh T, Yagihashi A, Watanabe N. Survivin enhances Fas ligand expression via upregulation of specificity protein 1-mediated gene transcription in colon cancer cells. *J Immunol.* 2004; 172:3922–3929.
- Rückert F, Sann N, Lehner AK, Saeger HD, Grützmann R, Pilarsky C. Simultaneous gene silencing of Bcl-2, XIAP and Survivin re-sensitizes pancreatic cancer cells towards apoptosis. *BMC Cancer.* 2010; 10:379.
- Kenny GD, Kamaly N, Kalber TL, Brody LP, Sahuri M, Shamsaei E, Miller AD, Bell JD. Novel multifunctional nanoparticle mediates siRNA tumour delivery, visualisation and therapeutic tumour reduction in vivo. *J Control Release.* 2011; 149: 111–116.
- Chawla-Sarkar M, Bae SI, Reu FJ, Jacobs BS, Lindner DJ, Borden EC. Downregulation of Bcl-2, FLIP or IAPs (XIAP and survivin) by siRNAs sensitizes resistant melanoma cells to Apo2L/TRAIL-induced apoptosis. *Cell Death Differ.* 2004; 11: 915–923.
- Kunze D, Kraemer K, Erdmann K, Froehner M, Wirth MP, Fuessel S. Simultaneous siRNA-mediated knockdown of antiapoptotic BCL2, Bcl-xL, XIAP and survivin in bladder cancer cells. *Int J Oncol.* 2012; 41:1271–1277.
